# Supplementary material for: l-Ascorbyl 2,6-dipalmitate inhibits biofilm formation and virulence in methicillin-resistant Staphylococcus aureus and prevents triacylglyceride accumulation in Caenorhabditis elegans
Source: Royal Society of Chemistry journal article supplement (doi:10.1039/c7ra02934a), 2017-01-01
Supplement: c7ra02934a1.pdf [file c7ra02934a1.pdf]

1 **L-Ascorbyl 2, 6-Dipalmitate inhibits biofilm and virulence in methicillin-resistant**  
2 **Staphylococcus aureus and prevents triacylglyceride accumulation in *Caenorhabditis***  
3 ***elegans***

4 Sivasamy Sethupathy<sup>1+</sup>, Loganathan Vigneshwari<sup>1+</sup>, Alaguvel Valliammai<sup>1</sup>, Krishnaswamy  
5 Balamurugan<sup>1</sup> & Shunmugiah Karutha Pandian<sup>1\*</sup>

6 <sup>1</sup>Department of Biotechnology, Alagappa University, Science Campus, Karaikudi 630 003,  
7 Tamil Nadu, India

8 \*Correspondence and requests for materials should be addressed to SKP.  
9 (email:sk\_pandian@rediffmail.com)

10 <sup>+</sup>These authors equally contributed to this work

11 **Supplementary information**

12 **Methods**

13 **Assay for inhibition of initial bacterial attachment**

14 The ability of ADP to inhibit the initial attachment of *S. aureus* MRSA on polystyrene  
15 surface was assessed using MTP assay<sup>1</sup>. Briefly, each 1 ml of TSBG was inoculated with  
16 overnight culture of *S. aureus* to an initial optical density (OD) of 0.05 at 600nm and  
17 supplemented with 10 to 100 µg mL<sup>-1</sup> of ADP (with an increment of 10 µg mL) for 8 h at 37° C.  
18 Following incubation, spent medium containing non-adherent cells were removed and the wells  
19 were washed with distilled water and air dried. CV staining and quantification was done as  
20 mentioned previously.

21 **Effect of plasma coating on antibiofilm activity of ADP**

22 Twenty percentage of human plasma was prepared in 50 mM sodium bicarbonate and  
23 dispensed (1 mL) on to 24 well MTP and incubated at 4° C for 12 h. After incubation, 20%  
24 plasma solution was pipetted out and the wells were washed with sterile distilled water<sup>2</sup>. Biofilm  
25 formation of *S. aureus* MRSA on plasma coated surface in the presence and absence of 10 to 100  
26 µg mL<sup>-1</sup> of ADP (with an increment of 10 µg mL<sup>-1</sup>) was assessed as mentioned previously.

## 27 **Light microscopic observation of antibiofilm activity**

28 MRSA was allowed to form the biofilm in the presence and absence of ADP (20, 40, 60,  
29 80 and 100  $\mu\text{g mL}^{-1}$ ) on glass slides (0.5×0.5 cm) in 24-well MTP containing each 1 mL of  
30 TSBG for 24 h at 37° C. After incubation, biofilm formed on glass slides were washed with  
31 distilled water and stained with 0.4 % crystal violet (CV) staining solution for 5 min and excess  
32 CV was washed off using distilled water. Washed slides were visualised under light microscope  
33 at 400× magnification<sup>3</sup>.

## 34 **Confocal laser scanning electron microscopic analysis of antibiofilm activity**

35 Control and ADP treated MRSA biofilm slides were prepared as mentioned previously  
36 and stained with 0.1 % (w/v) acridine orange for 1 min. Stained biofilm slides were rinsed with  
37 distilled water to wash off excess acridine orange and air-dried in dark. Then, control and treated  
38 MRSA biofilms were observed under CLSM (Carl Zeiss, Germany) equipped with Zen 2009  
39 image processing software at 20 × magnification<sup>3</sup>.

## 40 **Autoaggregation assay**

41 Effect of ADP treatment on the aggregation of MRSA was analysed as reported earlier<sup>4</sup>.  
42 Briefly, each 5 ml of TSBG was inoculated with overnight culture of *S. aureus* to an initial  
43 optical density (OD) of 0.05 at 600nm and supplemented without and with 20 to 100  $\mu\text{g mL}^{-1}$  of  
44 ADP (with an increment of 20  $\mu\text{g mL}^{-1}$ ) for 24 h at 37° C with shaking at 160 rpm. After  
45 incubation, cells were harvested by centrifugation at 12, 000 rpm for 5 min and cells were  
46 washed thrice with PBS. Washed cells were pelleted and resuspended in 5 mL of PBS and  
47 transferred into sterile glass tubes and allowed to stand at room temperature for 20 h. Cell  
48 density of the top portions of PBS containing MRSA cells were measured after 10 and 20 h at  
49 OD<sub>600</sub> nm. In addition, results were visually observed and photographed.

## 50 **Hemolysin assay**

51 Cell free culture supernatant (CFCS) of MRSA grown in the presence and absence of 10  
52 to 100  $\mu\text{g mL}^{-1}$  of ADP (with an increment of 10  $\mu\text{g mL}^{-1}$ ) was collected by centrifugation and  
53 stored at -20° C. To assess the effect of ADP on hemolysin production, each 100  $\mu\text{L}$  of CFCS  
54 from control and ADP treated MRSA cultures were mixed with 900  $\mu\text{L}$  of PBS containing 2%

55 sheep red blood cells and incubated at 37° C for 1 h. Following incubation, the reaction mix was  
56 centrifuged at 12, 000 rpm for 10 min at 4° C and the supernatants containing free haemoglobin  
57 was read at 534 nm. The results were expressed as percentage of reduction in hemolysin  
58 production<sup>5</sup>.

#### 59 **Lipase assay**

60 CFCS of control and ADP treated MRSA was prepared as mentioned previously. To  
61 assess the effect of ADP on lipase production, each 100 µL of CFCS from control and ADP  
62 treated MRSA cultures were mixed with 900 µL of lipase substrate buffer containing 1:9 volume  
63 of 0.3% (w/v) p-nitro phenyl palmitate in isopropanol and 50 mM Na<sub>2</sub>PO<sub>4</sub> buffer (pH 7.0)  
64 containing 0.2% (w/v) sodium deoxycholate and 0.1% (w/v) gummi arabicum and incubated at  
65 room temperature in dark for 1 h. Following incubation, lipase activity was terminated by adding  
66 equal volume of 1M Na<sub>2</sub>CO<sub>3</sub> to the reaction mix and centrifuged at 12, 000 rpm for 10 min. The  
67 absorbance of the supernatant was measured at 410 nm and the results were expressed as  
68 percentage of lipase inhibition<sup>6</sup>.

#### 69 **Autolysin assay**

70 MRSA was allowed to grow in the presence and absence of 20 to 100 µg mL<sup>-1</sup> of ADP  
71 (with an increment of 20 µg mL) at 37° C until the OD at 580 nm= 0.7. Then, the control and  
72 ADP treated cells were collected by centrifugation at 12, 000 rpm for 5 min and washed twice  
73 with ice cold sterile distilled water. Washed cells were pelleted and resuspended in autolysin  
74 buffer containing 0.05% (v/v) Triton X-100 in 0.05 M Tris-HCl, pH 7.0 to an initial OD of 1.0 ±  
75 0.2 at 580 nm. Then, the cell suspensions were incubated at 30° C and the lysis of cells was  
76 monitored by measuring the OD at 580 nm in 30 min intervals<sup>7</sup>.

#### 77 **Staphyloxanthin assay**

78 MRSA was inoculated in 5 ml of TSBG supplemented with 10 to 100 µg mL<sup>-1</sup> of ADP  
79 (with an increment of 10 µg mL<sup>-1</sup>) and grown at 37° C for 24 h at 160 rpm. After incubation,  
80 cells were harvested by centrifugation at 10, 000 rpm for 5 min and the cell pellets were washed  
81 twice with PBS. Tubes containing MRSA control and ADP treated cell pellets were visually  
82 observed for staphyloxanthin inhibition and photographed. For qualitative analysis of

83 staphyloxanthin inhibition, cell pellets were resuspended in ethanol and incubated at 40° C for 20  
84 min and centrifuged at 10, 000 rpm for 5 min. Ethanol extraction was repeated until the pellet  
85 becomes colourless. Then, the collected ethanolic extract was dried under vacuum and the crude  
86 staphyloxanthin concentrate was mixed with ethyl acetate/1.7 M aqueous sodium chloride (1: 1,  
87 v/v). The organic layer was saved and the ethyl acetate extraction was repeated until the aqueous  
88 layer becomes colourless. The collected ethyl acetate fraction was washed with distilled water  
89 and dried under vacuum. All the steps were carried out at room temperature and in the dark. The  
90 presence of carotenoids was measured using a quartz cuvette in multi-label reader (Spectramax  
91 M3, USA) at a suitable wavelength against ethyl acetate blank. Carotenoids such as 4, 4'-  
92 diapophytoene, 4, 4'-diaponeurosporene, 4, 4'-diaponeurosporenic acid and b-D-glucopyranosyl  
93 1-O-(4,4'-diaponeurosporene-4-oate)-6-O-(12-methyltetradecanoate) [staphyloxanthin] were  
94 measured at 286, 435, 455 and 462 nm, respectively<sup>7</sup>.

#### 95 **Effect of ADP on the colony morphology**

96 To ascertain the effect of ADP on the colony morphology, 50 µL of MRSA culture with a  
97 turbidity of McFarland standard number 2 was spread on TSBG agar supplemented with and  
98 without 100 µg mL<sup>-1</sup> of FDA. The plates were incubated at 37° C for 72 h and the colony  
99 morphology of control and ADP treated MRSA was visually observed and image acquisition was  
100 done using Gel Doc<sup>TM</sup> XR+ and processed with Image Lab<sup>TM</sup> software.

#### 101 **Whole-blood killing assay**

102 The turbidity of MRSA control and ADP treated cultures were adjusted to a McFarland  
103 standard number 2. One volume of culture and 3 volume of freshly drawn blood (heparinized)  
104 were mixed and incubated at 37° C for 4 h with shaking at 160 rpm and enumerated for viable  
105 cells<sup>8</sup>.

#### 106 **H<sub>2</sub>O<sub>2</sub> sensitivity assay**

107 MRSA control and ADP treated cultures were prepared as mentioned previously and their  
108 turbidity was adjusted to a McFarland standard number 2 with PBS containing 1 mM H<sub>2</sub>O<sub>2</sub>.  
109 Then, the cells were incubated at 37° C for 1 h with agitation at 160 rpm and enumerated for  
110 viable cells<sup>8</sup>.

111 **Singlet oxygen sensitivity assay**

112 MRSA control and ADP treated cultures were prepared as mentioned previously and their  
 113 turbidity was adjusted to a McFarland standard number 2. Methylene blue was added into 96  
 114 well plates containing 100  $\mu$ L of diluted MRSA cells to a final concentration of 10  $\mu$ g mL<sup>-1</sup>.  
 115 Then, exposed to light by precisely placing the plates 20 cm away from the 100 W light source  
 116 for 60 min and enumerated for viable cells<sup>8</sup>.

117 **Supplementary table 1. List of primers used for Q-PCR analysis to study the effect of ADP**  
 118 **on MRSA virulence and biofilm genes.**

| Genes       | Forward primer                        | Reverse primer                    |
|-------------|---------------------------------------|-----------------------------------|
| <i>saeS</i> | 5'-TGCCAATACCTTCATCGCTAA-3'           | 5'-CAATATCGAACGCCACTTGA-3'        |
| <i>aur</i>  | 5'-CAAAAGAGTGATGCGGTCAA-3'            | 5'-AGGTGCATGAACACCATCAA-3'        |
| <i>crtM</i> | 5'-ATCCAGAACCACCCGTTTTT-3'            | 5'-GCGATGAAGGTATTGGCATT-3'        |
| <i>crtN</i> | 5'-GATGAAGCTTGGACGCAACA-3'            | 5'-TTCGCATGATACGTTTGCTC-3'        |
| <i>geh</i>  | 5'-GTAGATTATGGCGCAGCACA-3'            | 5'-CCATGCGCTTTATGATAGGC-3'        |
| <i>agrC</i> | 5'-CATTGCGGTTGCATTTATTG-3'            | 5'-CCTAAACCACGACCTTCACC-3'        |
| <i>sarA</i> | 5'-CAAACAACCACAAGTTGTTAAAGC-3'        | 5'-TGTTTGCTTCAGTGATTCGTTT-3'      |
| <i>hld</i>  | 5'-TAATTAAGGAAGGAGTGATTTCAATG-3'      | 5'-TTTTTAGTGAATTTGTTCACTGTGTC-3'  |
| <i>ebpS</i> | 5-CATCCAGAACCAATCGAAGAC-3             | 5- AGTTACATCATCATGTTTATCTTTTG-3   |
| <i>agrA</i> | 5'-TGATAATCCTTATGAGGTGCTT-3'          | 5'-CACTGTGACTCGTAACGAAAA-3'       |
| <i>gyrB</i> | 5'-GGTGCTGGGCAAATACAAGT-3'            | 5'-TCCCACACTAAATGGTGCAA-3'        |
| <i>icaA</i> | 5'-ACACTTGCTGGCGCAGTCAA-3'            | 5'-TCTGGAACCAACATCCAACA-3'        |
| <i>icaB</i> | 5'-ATGGTCAAGCCCAGACAGAG-3'            | 5'-AGTATTTTCAATGTTTAAAGCA-3'      |
| <i>sspB</i> | 5'-CCAGCAAATTGTTGTTGTGCTAG-3'         | 5'-AAGCCAAAGCCGATTCACACTC-3'      |
| <i>fnbA</i> | 5'-ATCAGCAGATGTAGCGGAAG-3'            | 5'-TTTAGTACCGCTCGTTGTCC-3'        |
| <i>fnbB</i> | 5'-AAGAAGCACCGAAAAGTGTG-3'            | 5'-TCTCTGCAACTGCTGTAACG-3'        |
| <i>clfA</i> | 5'-ATTGGCGTGGCTTCAGTGCT-3'            | 5'-CGTTTCTCCGTAGTTGCATTTG-3'      |
| <i>altA</i> | 5'-TGTCGAAGTATTTGCCGACTTCGC-3'        | 5'-TGGAATCCTGCACATCCAGGAAC-3'     |
| <i>hla</i>  | 5'-CAACTGATAAAAAAGTAGGCTGGAAAGTGAT-3' | 5'-CTGGTGAAAACCCTGAAGATAATAGAG-3' |

119

120

121

122

123 **Supplementary table 2. List of primers used for Q-PCR analysis to study the effect of ADP**  
 124 **on *C. elegans*.**

| <b>Genes</b>       | <b>Primer sequences</b>      |
|--------------------|------------------------------|
| acs-1 fp           | 5'-GAACGGGGAAAGAGTGGAAT-3'   |
| acs-1 rp           | 5'-ATATCCAGCACGGAGACCAA-3'   |
| atg-1 fp           | 5'-GACTGGGACAGTCGAAGCAT-3'   |
| atg-1 rp           | 5'-CTGGCTCATTTCGATCAATC-3'   |
| sams-1 fp          | 5'-GAGGGGCATCCAGACAAAAT-3'   |
| sams-1 rp          | 5'-ACGACGGACGAGAACTTGAT-3'   |
| fat-6 fp           | 5'-TCCCCTTGTCATCTTGTGC-3'    |
| fat-6 rp           | 5'-GACGTTTTTCGACTGGGGTAA-3'  |
| akt-1 fp           | 5'-CCGGAGTATCTTGCACCAGA-3'   |
| akt-1 rp           | 5'-GCCTTCCACACATCATCTCG-3'   |
| eat-2 fp           | 5'-GCAAATTCCCCATGGTACAC-3'   |
| eat-2 rp           | 5'-TCTCGTGCTCACTTTCATG-3'    |
| aak-2 fp           | 5'-TGCTTCACCATATGCTCTGC-3'   |
| aak-2 rp           | 5'-ATTGCTGGGAGATGATCCAC-3'   |
| daf-16 fp          | 5'-TGGAATTCAATCGTGTGGAA-3'   |
| daf-16 rp          | 5'-CTGGAGGGCAGCATATTCAT-3'   |
| daf-2 fp           | 5'-TCGAGCTCTTCTACGGTGT-3'    |
| daf-2 rp           | 5'-GACACGTGGTGGACAAGATG-3'   |
| skn-1 fp           | 5'-CTCCATTTCGGTAGAGGACCA-3'  |
| skn-1 rp           | 5'-GAGAAATCGACAGTAGCGCC-3'   |
| age-1 fp           | 5'-TTAGAGCTCCACGGCACTTT-3'   |
| age-1 rp           | 5'-CGAAGAAAACGTGCTTGACA-3'   |
| ins-7 fp           | 5'-AGGTCCAGCAGAACCAGAAG-3'   |
| ins-7 rp           | 5'-GAAGTCGTCGGTGCATTCTT-3'   |
| sgk-1 fp           | 5'-TCAGGCACAAGGAGACCAA-3'    |
| sgk-1 rp           | 5'-GTGAAACAAGGAAAGGGTGT-3'   |
| egl-8 fp           | 5'-CGTATCGTTGCGCTTCTGA-3'    |
| egl8 rp            | 5'-AGTAGTGACACAGCGGTTG-3'    |
| sod-fp             | 5'-GGATGGTGGAGAACCTTCAA-3'   |
| sod-rp             | 5'-CATAGTCTGGGCGGACATTT-3'   |
| $\beta$ - actin fp | 5'-ATCGTCCTCGACTCTGGAGATG-3' |
| $\beta$ - actin rp | 5'-TCACGTCCAGCCAAGTCAAG-3'   |

125

126

127

128

129

130 **Supplementary table 3. Thermal cyclic conditions used for Q-PCR analysis**

|                             |                        |           |
|-----------------------------|------------------------|-----------|
| <b>Initial denaturation</b> | <b>95°C for 10 min</b> |           |
| <b>Denaturation</b>         | 95°C for 45 sec        |           |
| <b>Annealing</b>            | 58°C for 45 sec        | 40 cycles |
| <b>Extension</b>            | 72°C for 45 sec        |           |

131

132 **References**

- 133 1. M. Sandasi, C. M. Leonard and A. M. Viljoen, *Lett. Appl. Microbiol.*, 2010, **50**, 30.  
134 2. J. N. Walker and A. R. Horswill, *Front. Cell Infect. Microbiol.*, 2012, **2**,162.  
135 3. S. Gowrishankar, N. M. Duncun and S. K. Pandian, *Evid. Based. Complement. Alternat.*  
136 *Med.*, 2012, 862374.  
137 4. F. G. Sorroche, M. B. Spesia, Á. Zorreguieta and W. Giordano, *Appl. Environ.*  
138 *Microbiol.*, 2012, **78**, 4092.  
139 5. A. Annapoorani, R. Parameswari, S. K. Pandian and A. V. Ravi, *J. Microbiol. Methods*,  
140 2012, **91**, 208.  
141 6. K. Riedel, D. Talker-Huiber, M. Givskov, H. Schwab and L. Eberl, *Appl. Environ.*  
142 *Microbiol.*, 2003, **69**, 3901.  
143 7. N. A. Mani, P. H. Tobin and R. K. Jayaswal, *J. Bacteriol.*, **175**, 1493.  
144 8. Liu GY, Essex A, Buchanan JT, Datta V, Hoffman HM, Bastian JF, Fierer J, Nizet V, *J.*  
145 *Exp. Med.*, 2005, **202**, 209.  
146
